# Supplementary material for: Comparison of the dosimetry and cell survival effect of 177Lu and 161Tb somatostatin analog radiopharmaceuticals in cancer cell clusters and micrometastases
Source: PubMed Central journal article supplement — EJNMMI Phys. 2024 Nov 13;11:94. doi: 10.1186/s40658-024-00696-2 (PMC11561253; doi:10.1186/s40658-024-00696-2), 2024-11-13
Supplement: 40658_2024_696_MOESM1_ESM.pdf [file 40658_2024_696_MOESM1_ESM.pdf]

# Comparison of the Dosimetry and Cell Survival Effect of $^{177}\text{Lu}$ and $^{161}\text{Tb}$ Somatostatin Analog Radiopharmaceuticals in Cancer Cell Clusters and Micrometastases

Laura De Nardo<sup>1,2</sup>, Sara Santi<sup>3</sup>, Anna Dalla Pietà<sup>3</sup>, Guillermina Ferro-Flores<sup>4</sup>, Erika Azorín-Vega<sup>4</sup>, Emma Nascimbene<sup>5</sup>, Vito Barbieri<sup>3</sup>, Alessandra Zorz<sup>6</sup>, Antonio Rosato<sup>3,5</sup>, Laura Meléndez-Alafort<sup>5\*</sup>

<sup>1</sup>Department of Physics and Astronomy, University of Padua, Via Marzolo 8, I-35131 Padua, Italy

<sup>2</sup>INFN-Padua, National Institute of Nuclear Physics, Via Marzolo 8, I-35131 Padua, Italy

<sup>3</sup>Department of Surgery, Oncology and Gastroenterology, University of Padua, Via Gattamelata 64, 35128 Padua, Italy

<sup>4</sup>Department of Radioactive Materials, National Institute of Nuclear Research (ININ), Carretera México-Toluca S/N. La Marquesa, Ocoyoacac 52750, Mexico

<sup>5</sup>Immunology and Molecular Oncology Diagnostics Unit, Veneto Institute of Oncology IOV – IRCCS, Via Gattamelata 64, 35128 Padua, Italy

<sup>6</sup>Medical Physics Department, Veneto Institute of Oncology IOV-IRCCS, Via Gattamelata 64, I-35128 Padua, Italy

## Supplementary data

### Cell Culture

The AR42J (CRL1492) rat pancreatic tumor cell line (ATCC, Manassas, USA) was cultured in Dulbecco's modified Eagle's medium (DMEM) high glucose (Euroclone, Milan, Italy) supplemented with 10% heat-inactivated fetal bovine serum (FBS) (Gibco-Thermo Scientific, MA, USA), 1% antibiotics (penicillin/streptomycin) (Lonza-Euroclone, Milan, Italy), 1% HEPES buffer (Lonza-Euroclone, Milan, Italy), and 1% L-glutamine (Lonza-Euroclone, Milan, Italy). This solution will be referred to as a complete medium. The cells were grown in 75 cm<sup>2</sup> flasks, passed twice a week, and maintained in the incubator at 37 °C in a humidified atmosphere containing 5% CO<sub>2</sub>.

### Verification of the accuracy and homogeneity of the dose delivered by gamma irradiators

Cell irradiation for survival studies was performed using two gamma irradiators: 1) The Gammacell 220 irradiator (Atomic Energy of Canada, Ottawa, Canada) containing a cobalt-60 source with a dose rate of 7.5 Gy/h; 2) IBL 430 C biological sample irradiator (Schering/Cys bio-International Milan, Italy) containing a cesium-137 source at a dose rate of 120 Gy/h.

To ensure the accuracy and consistency of the dose delivered by the Gammacell 220 irradiator, direct ionization measurements were conducted using a secondary standard ionization chamber NE2611 (NPL, Middlesex, UK) certified by BIPM. Measurements were taken every 60 seconds at the central point of the field under controlled environmental conditions, with air density correction applied, until a dose of 10 Gy was reached. The results showed that the dose delivered by the Gammacell 220 irradiator had a total uncertainty of only 0.75% in the dose range studied.

The accuracy and uniformity of the dose delivered by the IBL 430 C irradiator during cell irradiation were evaluated using the Gafchromic EBT3 film. Prior to the commencement of the experiment, the EBT3 film batch underwent dose calibration. Calibration was performed according to the method proposed by Devic et al. (Devic S., et al. *Medical Physics*, 2005. **32**(7): 2245). An Epson Expression 10000 XL scanner (Epson, Japan) was used to read all films 48 hours after irradiation. Digitalized

images were acquired in RGB positive mode with 24-bit depth per color channel and a spatial resolution of 75 dots per inch (dpi). The red channel was used for dose measurements, and analysis was performed using DoseLab Pro software (Varian Medical Systems). The delivered dose was compared to the expected value. The relative difference between the expected and measured values was calculated. Orthogonal profiles were acquired on each irradiated film to verify the homogeneity of the irradiation. The maximum difference between the net optical density OD and the mean of the profile points was calculated to verify the uniformity of the irradiation. The resulting calibration curve was used to relate the film OD to the absorbed dose. Next, pieces of film, 10x10 cm<sup>2</sup>, were irradiated at three different dose values in the region of interest, precisely 2.5, 5, and 10 Gy. The measurements were conducted in two different positions, at the base of the irradiation support and at a distance of 1 cm from it. Then calibration curve was employed to establish a relationship between the film OD and the absorbed dose. The percentage differences between the expected and measured dose values after evaluation of the Gafchromic film dosimetry for the IBL 430 C irradiator were found to be less than 5%. Uniformity indices were less than 5% and independent of the position of the measurement.

**Table S1.** Total number of cells and number of labeled cells for different percentage of labeling in 2D circular colonies or 3D spherical cell clusters models of different sizes (radius), used for the dose calculation with the MIRDcell software.

| Size (μm) | 2D colony             |                         |      |      | 3D cluster            |                         |        |        |
|-----------|-----------------------|-------------------------|------|------|-----------------------|-------------------------|--------|--------|
|           | Total number of cells | Number of labeled cells |      |      | Total number of cells | Number of labeled cells |        |        |
|           |                       | 10%                     | 40%  | 70%  |                       | 10%                     | 40%    | 70%    |
| 25        | 9                     | 1                       | 4    | 6    | 19                    | 2                       | 7      | 13     |
| 50        | 29                    | 3                       | 11   | 20   | 123                   | 13                      | 49     | 86     |
| 100       | 121                   | 12                      | 48   | 84   | 1021                  | 102                     | 408    | 714    |
| 200       | 489                   | 49                      | 195  | 342  | 8217                  | 822                     | 3286   | 5751   |
| 300       | 1101                  | 110                     | 440  | 770  | 27609                 | 2761                    | 11043  | 19326  |
| 500       | 3069                  | 307                     | 1227 | 2148 | 127675                | 12768                   | 51070  | 89372  |
| 750       | 6909                  | 691                     | 2763 | 4836 | 431545                | 43155                   | 172618 | 302081 |
| 1000      | 12281                 | 1228                    | 4912 | 8596 | 1023349               | 102335                  | 409339 | 716344 |

**Table S2.** Relative enhancement of the mean dose to labeled cells (MDLC) and unlabeled cells (MDUC) resulting from an increase in cluster size from 25 to 1000 μm, calculated using a mean number of disintegrations per cell of 18,900 and 10%, 40%, or 70% of cells labeled with <sup>177</sup>Lu-RPs or <sup>161</sup>Tb-RPs.

| Radiopharmaceutical       | Cluster size (μm)  | MDUC (Gy) | MDLC 10% (Gy) | MDLC 40% (Gy) | MDLC 70% (Gy) |
|---------------------------|--------------------|-----------|---------------|---------------|---------------|
| <sup>177</sup> Lu-DOTATOC | 25                 | 4.2       | 37.5          | 14.2          | 9.2           |
|                           | 1000               | 82.5      | 119           | 91.7          | 87.8          |
|                           | <b>Relative DI</b> | 1864      | 217           | 546           | 854           |
| <sup>177</sup> Lu-NLS     | 25                 | 4.3       | 41.1          | 14.9          | 10.6          |
|                           | 1000               | 82.5      | 124           | 93            | 88.5          |
|                           | <b>Relative DI</b> | 1819      | 202           | 524           | 735           |
| <sup>177</sup> Lu-LM3     | 25                 | 4.5       | 27.6          | 11.2          | 8.5           |
|                           | 1000               | 82.7      | 111           | 89.7          | 86.7          |
|                           | <b>Relative DI</b> | 1738      | 302           | 701           | 920           |
| <sup>161</sup> Tb-DOTATOC | 25                 | 11.7      | 131           | 43.2          | 29.4          |
|                           | 1000               | 101       | 232           | 134           | 119           |
|                           | <b>Relative DI</b> | 763       | 77            | 210           | 305           |
| <sup>161</sup> Tb-NLS     | 25                 | 10.3      | 149           | 51.1          | 31.7          |
|                           | 1000               | 100       | 257           | 140           | 123           |
|                           | <b>Relative DI</b> | 871       | 72            | 174           | 288           |
| <sup>161</sup> Tb-LM3     | 25                 | 10.5      | 102           | 37.1          | 25.8          |
|                           | 1000               | 101       | 202           | 126           | 116           |
|                           | <b>Relative DI</b> | 862       | 98            | 240           | 350           |

**Table S3.** Calculated MDC, MDUC and MDLC for 2D colonies and 3D cell clusters with radius of 25, 50, 100, 500 or 1000  $\mu\text{m}$  considering 10, 40 or 70% of labeled cells and a mean number of disintegrations per cell of 18,900. MDC and MDUC are reported as mean values and standard deviations of calculations performed with different percentage of labeled cells (10, 40 and 70%).

| <sup>177</sup> Lu-DOTATOC | Radius ( $\mu\text{m}$ ) | MDC (Gy)    | MDUC (Gy)  | MDLC 10% (Gy) | MDLC 40% (Gy) | MDLC 70% (Gy) |
|---------------------------|--------------------------|-------------|------------|---------------|---------------|---------------|
| 2D                        | 25                       | 6.12±0.20   | 2.49±0.37  | 33.10         | 11.40         | 7.60          |
|                           | 50                       | 7.72±0.37   | 3.98±0.40  | 39.30         | 14.50         | 8.89          |
|                           | 100                      | 8.98±0.04   | 5.45±0.13  | 39.90         | 14.40         | 10.60         |
|                           | 500                      | 11.50±0.00  | 7.86±0.00  | 44.40         | 16.90         | 13.00         |
|                           | 1000                     | 12.00±0.00  | 8.32±0.02  | 45.20         | 17.50         | 13.60         |
| 3D                        | 25                       | 7.65±0.33   | 4.19±0.40  | 37.50         | 14.20         | 9.18          |
|                           | 50                       | 13.90±0.20  | 9.97±0.44  | 47.30         | 18.90         | 15.80         |
|                           | 100                      | 24.33±0.15  | 20.70±0.20 | 57.70         | 29.90         | 25.80         |
|                           | 500                      | 66.33±0.06  | 62.67±0.06 | 99.30         | 72.00         | 67.90         |
|                           | 1000                     | 86.23±0.06  | 82.53±0.06 | 119.00        | 91.70         | 87.80         |
| 3D/2D                     | 25                       | 1.25±0.07   | 1.68±0.30  | 1.13          | 1.25          | 1.87          |
|                           | 50                       | 1.80±0.09   | 2.50±0.27  | 1.20          | 1.30          | 2.13          |
|                           | 100                      | 2.71±0.02   | 3.80±0.10  | 1.45          | 2.08          | 2.43          |
|                           | 500                      | 5.77±0.01   | 7.97±0.01  | 2.24          | 4.26          | 5.22          |
|                           | 1000                     | 7.19±0.01   | 9.92±0.03  | 2.63          | 5.24          | 6.46          |
| <sup>177</sup> Lu-NLS     | Radius ( $\mu\text{m}$ ) | MDC (Gy)    | MDUC (Gy)  | MDLC 10% (Gy) | MDLC 40% (Gy) | MDLC 70% (Gy) |
| 2D                        | 25                       | 6.52±0.17   | 2.90±0.09  | 37.40         | 10.80         | 8.24          |
|                           | 50                       | 7.66±0.27   | 3.49±0.29  | 42.10         | 15.40         | 9.48          |
|                           | 100                      | 9.45±0.07   | 5.38±0.12  | 46.90         | 15.60         | 11.30         |
|                           | 500                      | 11.967±0.06 | 7.78±0.05  | 49.60         | 18.30         | 13.70         |
|                           | 1000                     | 12.500±0.00 | 8.33±0.01  | 49.70         | 18.70         | 14.30         |
| 3D                        | 25                       | 8.41±0.20   | 4.34±0.28  | 41.10         | 14.90         | 10.60         |
|                           | 50                       | 13.90±0.44  | 9.89±0.27  | 45.90         | 20.50         | 15.90         |
|                           | 100                      | 24.333±0.47 | 20.37±0.49 | 60.00         | 30.50         | 26.40         |
|                           | 500                      | 66.80±0.00  | 62.63±0.06 | 104.0         | 73.00         | 68.60         |
|                           | 1000                     | 86.70±0.00  | 82.50±0.00 | 124.0         | 93.00         | 88.50         |
| 3D/2D                     | 25                       | 1.29±0.04   | 1.50±0.11  | 1.10          | 1.38          | 1.81          |
|                           | 50                       | 1.82±0.09   | 2.83±0.25  | 1.10          | 1.33          | 2.16          |
|                           | 100                      | 2.57±0.05   | 3.78±0.12  | 1.28          | 1.96          | 2.34          |
|                           | 500                      | 5.58±0.03   | 8.05±0.05  | 2.10          | 3.99          | 5.01          |
|                           | 1000                     | 6.94±0.00   | 9.91±0.01  | 2.49          | 4.97          | 6.19          |
| <sup>177</sup> Lu-LM3     | Radius ( $\mu\text{m}$ ) | MDC (Gy)    | MDUC (Gy)  | MDLC 10% (Gy) | MDLC 40% (Gy) | MDLC 70% (Gy) |
| 2D                        | 25                       | 5.11±0.25   | 2.90±0.11  | 25.20         | 7.51          | 6.08          |
|                           | 50                       | 6.35±0.41   | 3.06±0.06  | 30.10         | 12.00         | 8.35          |
|                           | 100                      | 8.30±0.15   | 5.69±0.16  | 32.40         | 12.10         | 9.31          |
|                           | 500                      | 10.70±0.00  | 7.89±0.04  | 35.30         | 14.90         | 11.90         |
|                           | 1000                     | 11.20±0.00  | 8.41±0.00  | 36.10         | 15.40         | 12.40         |
| 3D                        | 25                       | 7.08±0.18   | 4.49±0.29  | 27.60         | 11.20         | 8.470         |
|                           | 50                       | 12.80±0.10  | 10.37±0.15 | 35.60         | 16.50         | 13.60         |
|                           | 100                      | 23.27±0.25  | 20.53±0.29 | 47.80         | 27.40         | 24.70         |
|                           | 500                      | 65.57±0.06  | 62.77±0.06 | 90.60         | 69.70         | 66.90         |
|                           | 1000                     | 85.47±0.06  | 82.67±0.06 | 111.00        | 89.70         | 86.70         |
| 3D/2D                     | 25                       | 1.38±0.08   | 1.55±0.11  | 1.10          | 1.49          | 1.84          |
|                           | 50                       | 2.01±0.13   | 3.39±0.09  | 1.18          | 1.37          | 1.98          |
|                           | 100                      | 2.80±0.06   | 3.61±0.11  | 1.48          | 2.26          | 2.65          |
|                           | 500                      | 6.13±0.01   | 7.95±0.04  | 2.57          | 4.68          | 5.62          |
|                           | 1000                     | 7.63±0.01   | 9.83±0.01  | 3.07          | 5.82          | 6.99          |

| <sup>161</sup> Tb-DOTATOC | Radius (μm) | MDC (Gy)    | MDUC (Gy)   | MDLC 10% (Gy) | MDLC 40% (Gy) | MDLC 70% (Gy) |
|---------------------------|-------------|-------------|-------------|---------------|---------------|---------------|
| 2D                        | 25          | 18.23±0.61  | 5.22±0.34   | 119.00        | 33.80         | 25.90         |
|                           | 50          | 20.70±1.15  | 7.72±0.84   | 129.00        | 43.70         | 26.80         |
|                           | 100         | 23.87±0.23  | 10.77±0.25  | 140.00        | 44.400        | 29.700        |
|                           | 500         | 27.03±0.06  | 13.83±0.12  | 147.00        | 47.000        | 32.700        |
|                           | 1000        | 27.67±0.06  | 14.43±0.06  | 146.00        | 47.400        | 33.300        |
| 3D                        | 25          | 24.03±1.57  | 11.67±1.42  | 131.00        | 43.200        | 29.400        |
|                           | 50          | 32.83±1.10  | 19.57±0.55  | 139.00        | 54.800        | 38.600        |
|                           | 100         | 45.70±0.26  | 32.67±0.12  | 161.00        | 65.80         | 51.10         |
|                           | 500         | 91.00±0.00  | 77.83±0.06  | 209.00        | 111.00        | 96.60         |
|                           | 1000        | 114.0±0.00  | 101.00±0.00 | 232.00        | 134.00        | 119.00        |
| 3D/2D                     | 25          | 1.32±0.10   | 2.23±0.31   | 1.10          | 1.28          | 1.67          |
|                           | 50          | 1.59±0.10   | 2.54±0.29   | 1.08          | 1.25          | 2.04          |
|                           | 100         | 1.91±0.02   | 3.03±0.07   | 1.15          | 1.48          | 1.72          |
|                           | 500         | 3.37±0.01   | 5.63±0.05   | 1.42          | 2.36          | 2.95          |
|                           | 1000        | 4.12±0.01   | 6.70±0.03   | 1.59          | 2.83          | 3.57          |
| <sup>161</sup> Tb-NLS     | Radius (μm) | MDC (Gy)    | MDUC (Gy)   | MDLC 10% (Gy) | MDLC 40% (Gy) | MDLC 70% (Gy) |
| 2D                        | 25          | 21.33±0.49  | 7.43±0.38   | 141.00        | 38.00         | 27.70         |
|                           | 50          | 23.10±0.61  | 7.67±0.77   | 154.00        | 50.30         | 30.10         |
|                           | 100         | 26.23±0.47  | 10.77±0.35  | 167.00        | 49.10         | 33.30         |
|                           | 500         | 29.40±0.00  | 13.73±0.12  | 172.00        | 52.90         | 36.10         |
|                           | 1000        | 30.07±0.06  | 14.47±0.06  | 171.00        | 53.50         | 36.70         |
| 3D                        | 25          | 24.83±0.72  | 10.25±1.08  | 149.00        | 51.10         | 31.70         |
|                           | 50          | 35.53±0.49  | 20.00±0.17  | 165.00        | 60.20         | 41.90         |
|                           | 100         | 48.17±0.31  | 32.70±0.00  | 191.00        | 70.60         | 54.80         |
|                           | 500         | 93.30±0.00  | 77.70±0.00  | 234.00        | 117.00        | 100.00        |
|                           | 1000        | 116.00±0.00 | 100.00±0.00 | 257.00        | 140.00        | 123.00        |
| 3D/2D                     | 25          | 1.16±0.04   | 1.38±0.16   | 1.06          | 1.34          | 1.84          |
|                           | 50          | 1.54±0.05   | 2.61±0.26   | 1.07          | 1.20          | 2.00          |
|                           | 100         | 1.84±0.04   | 3.04±0.10   | 1.14          | 1.44          | 1.65          |
|                           | 500         | 3.17±0.00   | 5.66±0.05   | 1.36          | 2.21          | 2.77          |
|                           | 1000        | 3.86±0.01   | 6.91±0.03   | 1.50          | 2.62          | 3.35          |
| <sup>161</sup> Tb-LM3     | Radius (μm) | MDC (Gy)    | MDUC (Gy)   | MDLC 10% (Gy) | MDLC 40% (Gy) | MDLC 70% (Gy) |
| 2D                        | 25          | 16.10±0.46  | 7.07±0.50   | 90.60         | 26.00         | 20.80         |
|                           | 50          | 18.70±0.62  | 8.38±1.68   | 102.00        | 34.20         | 24.30         |
|                           | 100         | 21.33±0.23  | 11.17±0.60  | 110.00        | 37.20         | 25.60         |
|                           | 500         | 24.27±0.06  | 14.23±0.06  | 115.00        | 39.40         | 28.60         |
|                           | 1000        | 24.93±0.06  | 14.83±0.06  | 116.00        | 40.10         | 29.20         |
| 3D                        | 25          | 21.60±3.18  | 10.46±1.47  | 102.00        | 37.10         | 25.80         |
|                           | 50          | 30.80±1.35  | 21.10±1.48  | 113.00        | 43.10         | 35.30         |
|                           | 100         | 43.07±0.31  | 32.97±0.31  | 134.00        | 58.40         | 47.70         |
|                           | 500         | 88.47±0.06  | 78.43±0.12  | 179.00        | 104.00        | 92.80         |
|                           | 1000        | 111.00±0.00 | 101.00±0.00 | 202.00        | 126.00        | 116.00        |
| 3D/2D                     | 25          | 1.34±0.20   | 1.48±0.23   | 1.13          | 1.43          | 1.78          |
|                           | 50          | 1.65±0.09   | 2.52±0.53   | 1.11          | 1.26          | 1.77          |
|                           | 100         | 2.02±0.03   | 2.95±0.16   | 1.22          | 1.57          | 1.86          |
|                           | 500         | 3.65±0.01   | 5.51±0.02   | 1.56          | 2.64          | 3.24          |
|                           | 1000        | 4.45±0.01   | 6.81±0.03   | 1.74          | 3.14          | 3.97          |

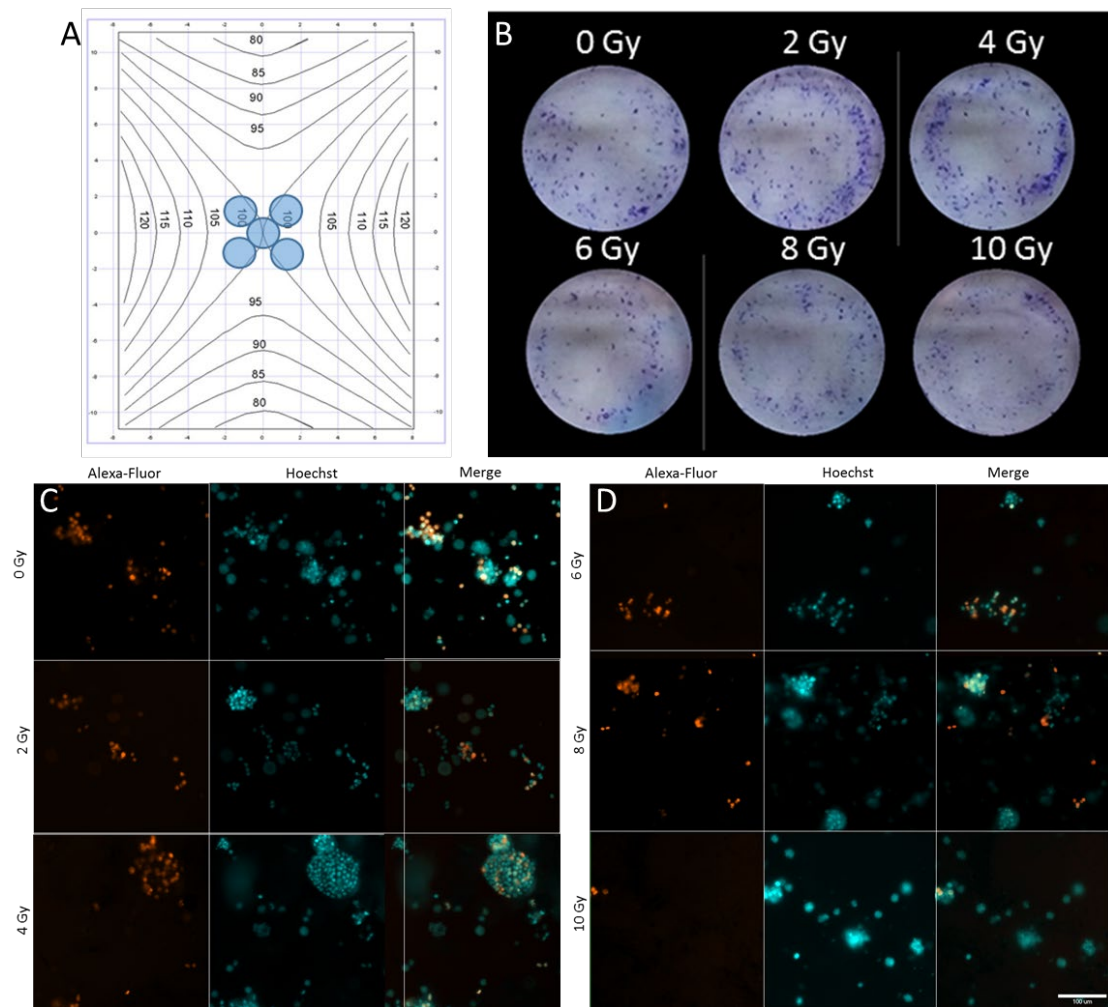

**Figure S1.** Representative images of the cell proliferation result. A) Scheme of the experimental setup used for the irradiation of the well plates containing the cells for the clonogenic assay, B) representative image of the colonies formed by the AR42J cells that were exposed to different ADs in the clonogenic assay; C) and D) representative fluorescence image of EdU thymidine analog incorporation by cells in EdU proliferation assay (first column in red), counter-stained with Hoechst (second column, blue) to determine the total number of cells and the combined image of both fluorophores (third column, merge).

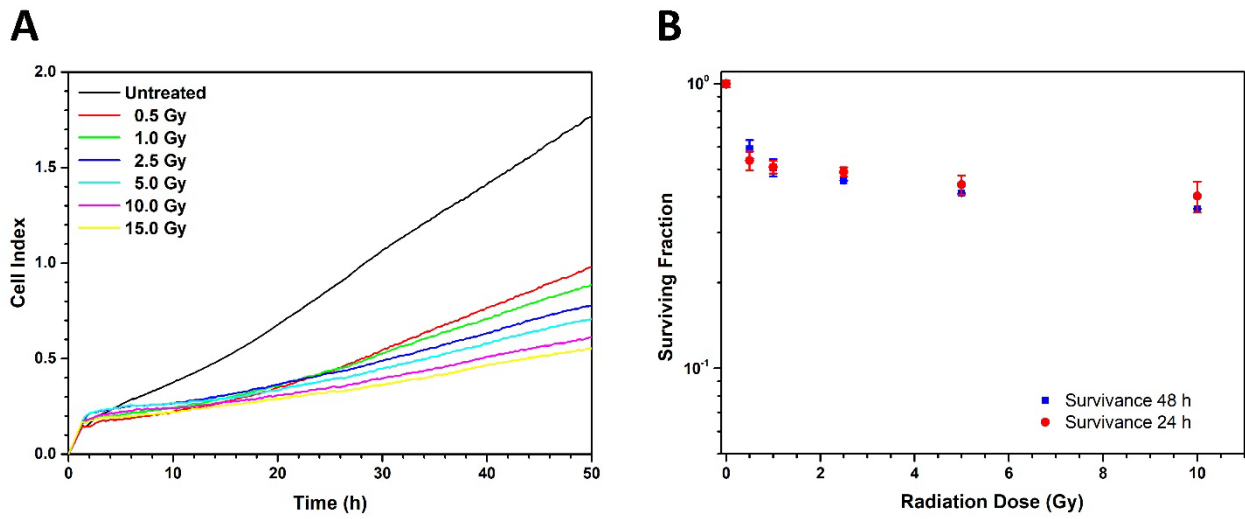

**Figure S2.** A) Average of cell index values of 3 experiments monitored by impedance-based real-time cell analysis from 15 min to 50 h. B) Survival curves obtained at 24 and 48 h after irradiation. Points represent the mean values of six experiments. Bars are the standard errors.

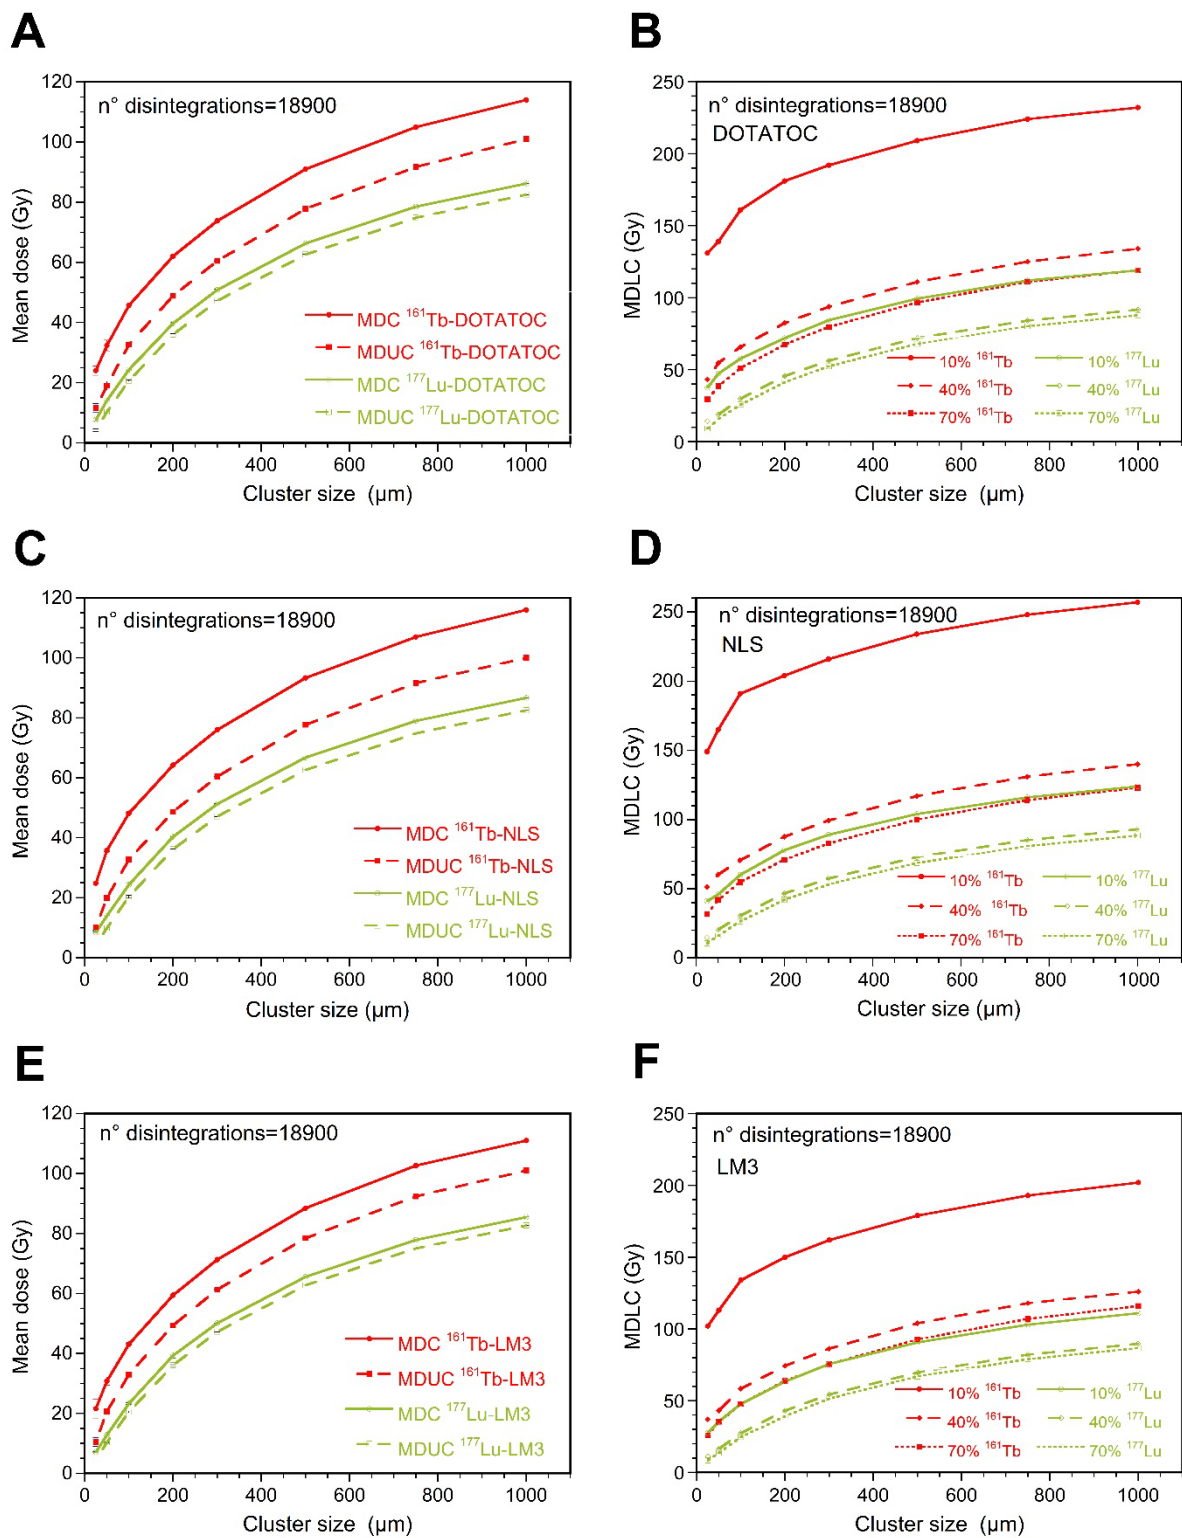

**Figure S3.** Comparison of MDC, MDUC and MDLC (for 10, 40 and 70% of labeled cells) of  $^{177}\text{Lu}$ - and  $^{161}\text{Tb}$ -RPs, obtained using the same mean number of disintegrations per cell (18,900), vs. the radius of the spherical cell cluster.



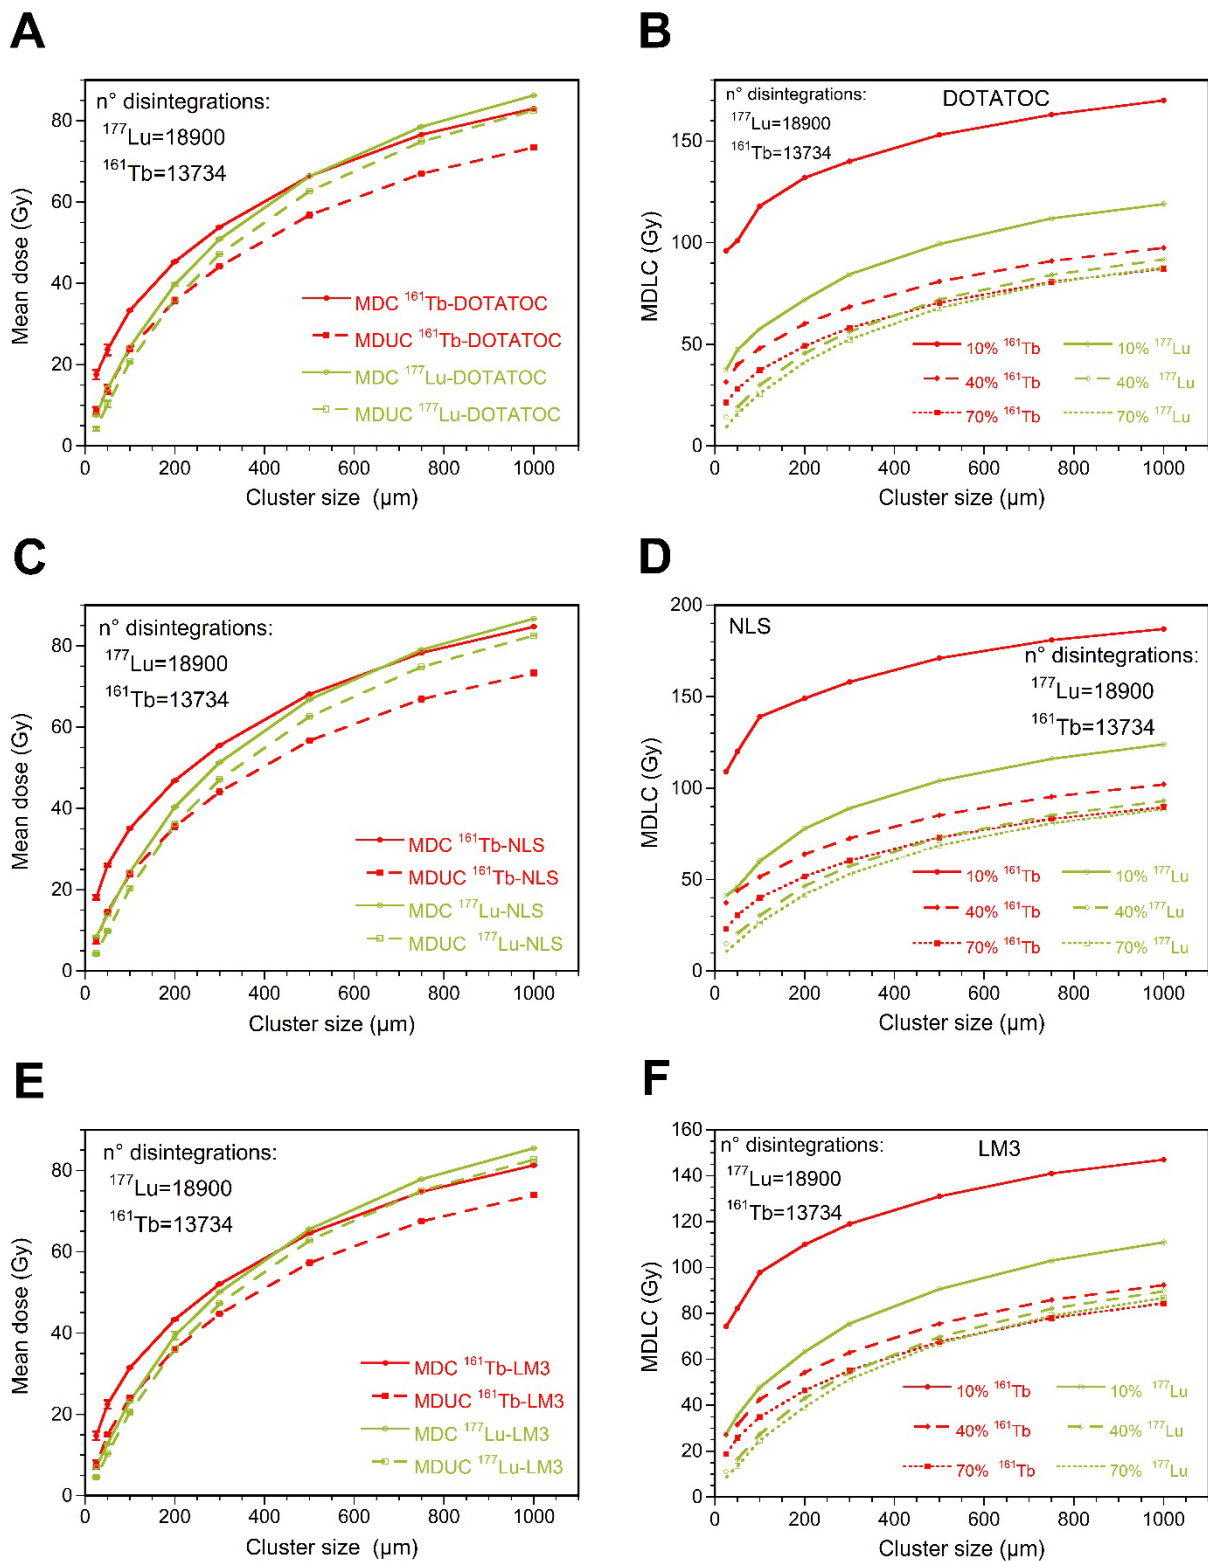

**Figure S4.** Comparison of  $^{177}\text{Lu}$ - and  $^{161}\text{Tb}$ -RPs MDC, MDUC and MDLC (for 10, 40 and 70% of labeled cells) obtained using a mean number of disintegrations per cell of 18,900 for  $^{177}\text{Lu}$ -RPs and of 13,734 for  $^{161}\text{Tb}$ -RPs vs. the radius of the spherical cell cluster.

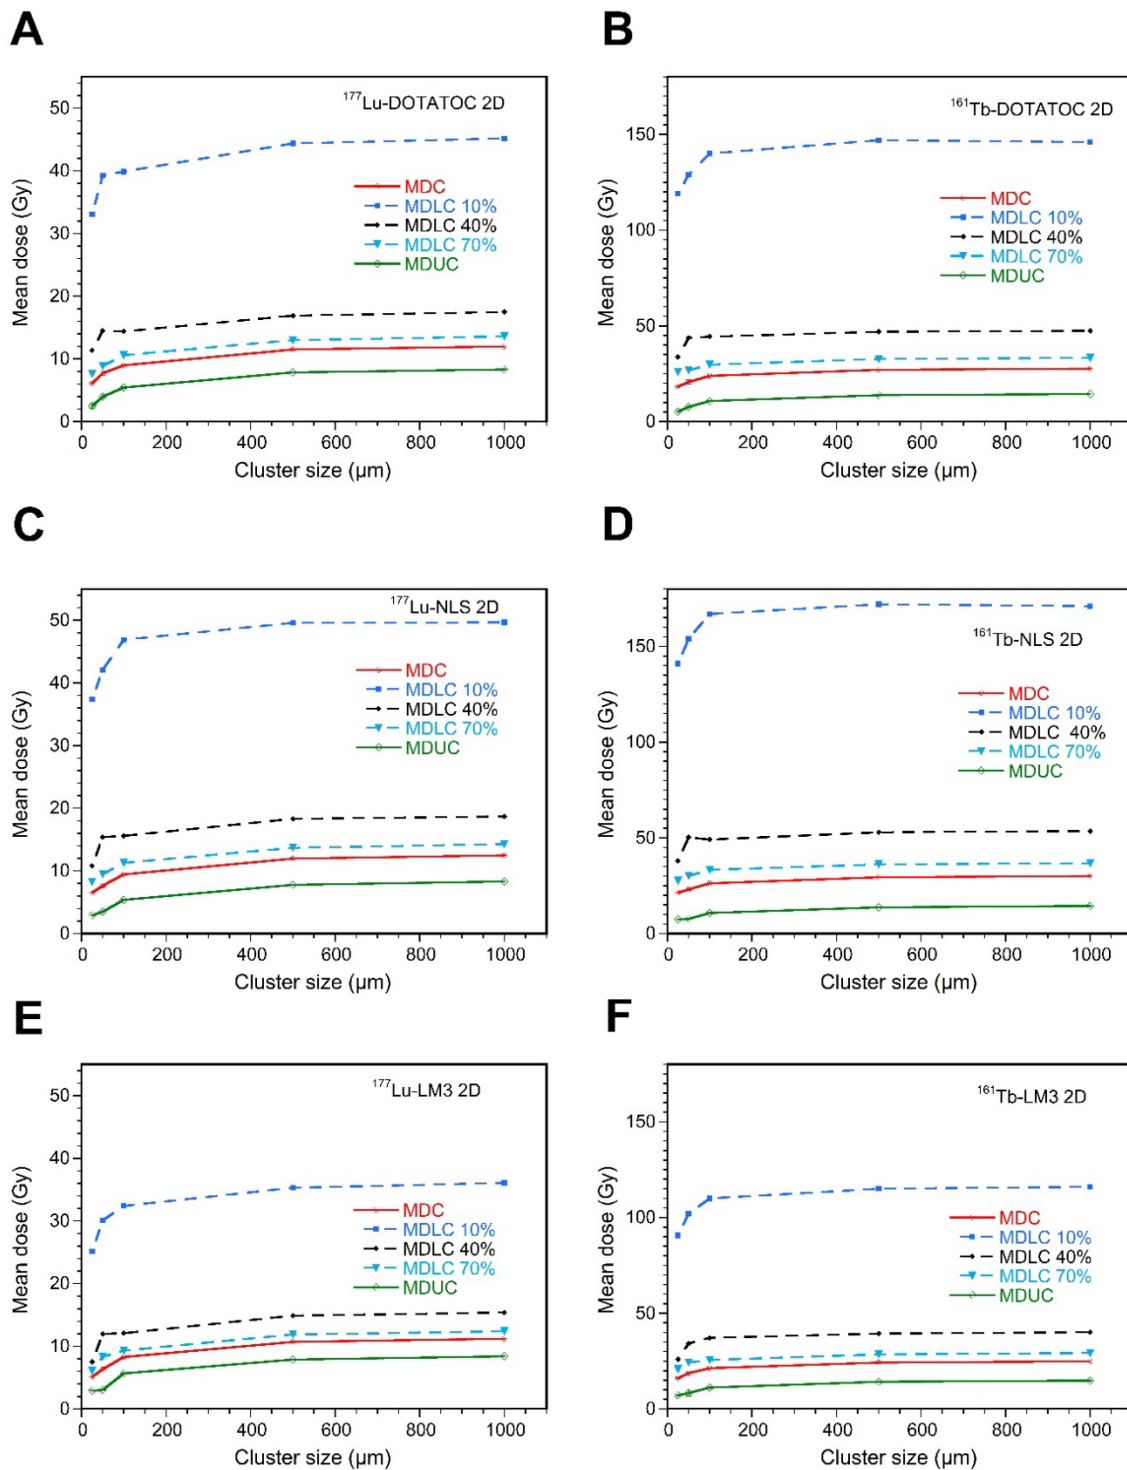

**Figure S5.** MDC, MDUC and MDLC considering 10, 40 or 70% of labeled cells and a mean number of disintegrations per cell of 18,900 for both  $^{177}\text{Lu}$ -RPs and  $^{161}\text{Tb}$ -RPs vs. the radius of the circular cell colony. For  $^{177}\text{Lu}$ -DOTATOC (A), the increase in MDUC, MDLC-10%, MDLC-40% and MDLC-70% by moving from a 25  $\mu\text{m}$  to a 1000  $\mu\text{m}$  colony is 234, 37, 54 and 79%, respectively. Similar values were obtained for  $^{177}\text{Lu}$ -NLS (187, 33, 73 and 62%) (C) and  $^{177}\text{Lu}$ -LM3 (190, 43, 105 and 104%) (E). For  $^{161}\text{Tb}$ -DOTATOC (B), the increase in MDUC, MDLC-10%, MDLC-40%, and MDLC-70%, by increasing the radius of the circular colony from 25  $\mu\text{m}$  to 1000  $\mu\text{m}$ , is 176, 23, 40 and 29%, respectively. Similar values were obtained for the other  $^{161}\text{Tb}$ -RPs (95, 21, 41 and 32% for  $^{161}\text{Tb}$ -NLS (D) and 110, 28, 54 and 40% for  $^{161}\text{Tb}$ -LM3 (E), respectively). In all cases, the increment of values was much lower in 2D compared to 3D models (see Table S2).

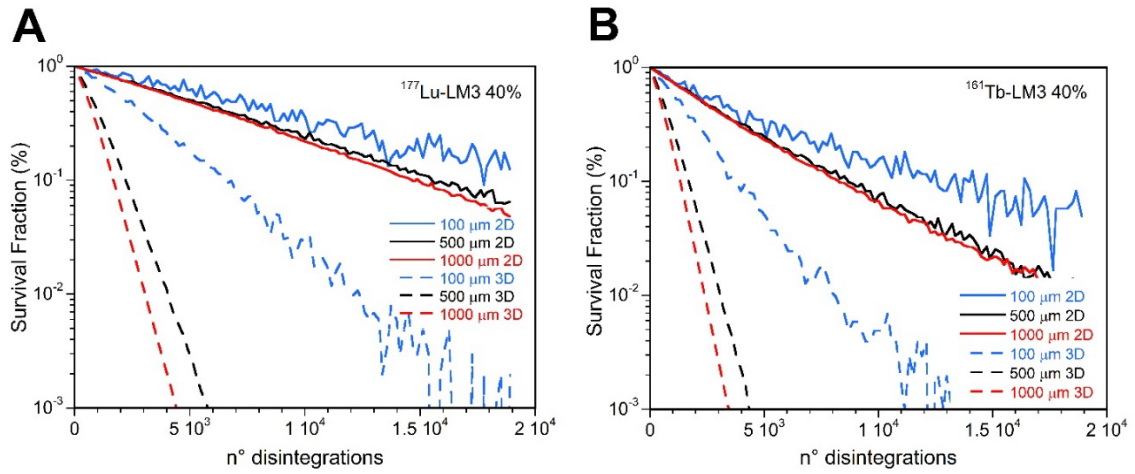

**Figure S6.** Survival fraction versus the mean number of disintegrations per cell for 100, 500 and 1000  $\mu\text{m}$  colony and cluster radius in both the 2D and 3D geometry after A)  $^{177}\text{Lu-LM3}$  treatment and B)  $^{161}\text{Tb-LM3}$  treatment, considering 40% of labeled cells. No significant differences were found in the 2D case between the SF curves for 500  $\mu\text{m}$  and 1000  $\mu\text{m}$  colony, unlike the 3D case. Large differences in the SF curves are evident between the 2D and the 3D case.

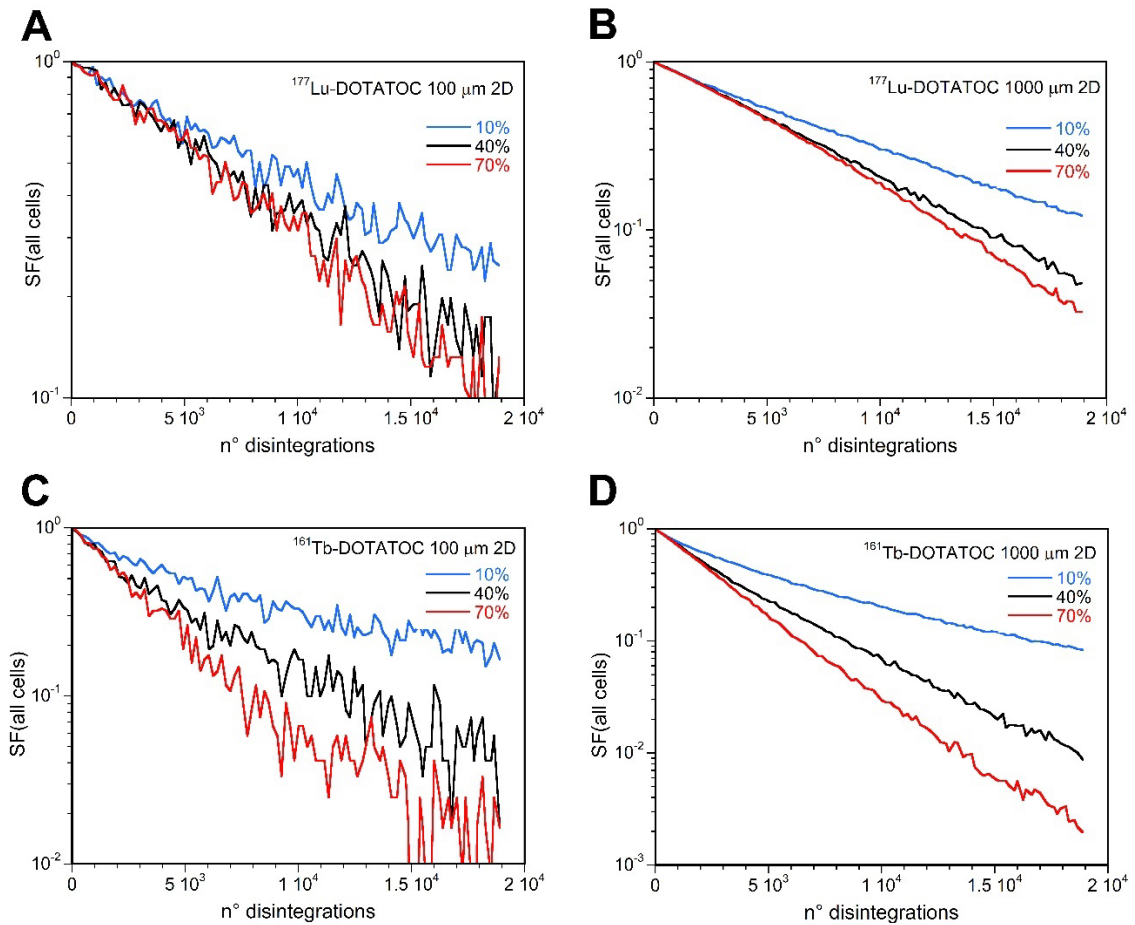

**Figure S7.** Survival fraction versus the mean number of disintegrations per cell for 100 and 1000  $\mu\text{m}$  colony considering 10, 40 and 70% of labeled cells after  $^{177}\text{Lu-DOTATOC}$  treatment (A and B) and  $^{161}\text{Tb-DOTATOC}$  treatment (C and D).

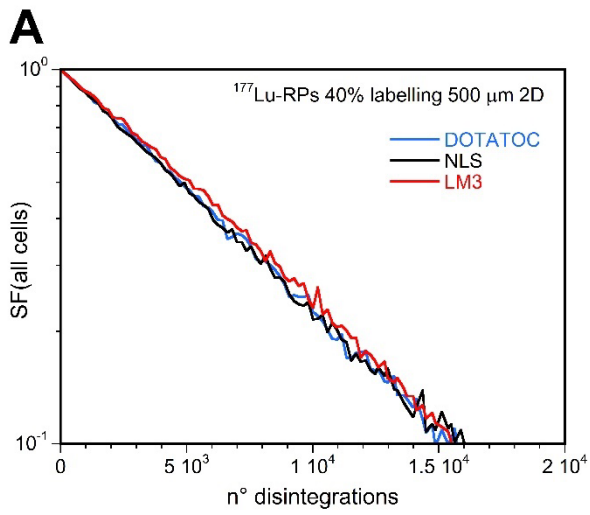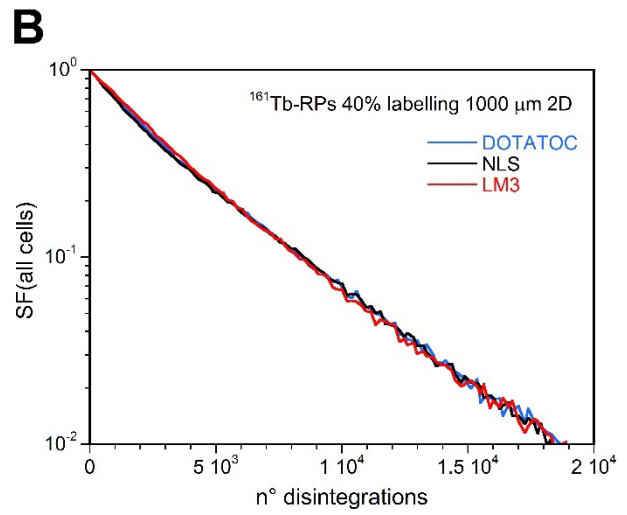

**Figure S8.** Comparison of the survival fraction versus the mean number of disintegrations per cell after treatment of a A) 500  $\mu\text{m}$  radius colony with  $^{177}\text{Lu}$ -RPs and B) 1000  $\mu\text{m}$  radius colony with  $^{161}\text{Tb}$ -RPs, considering 40% labeled cells in both cases.

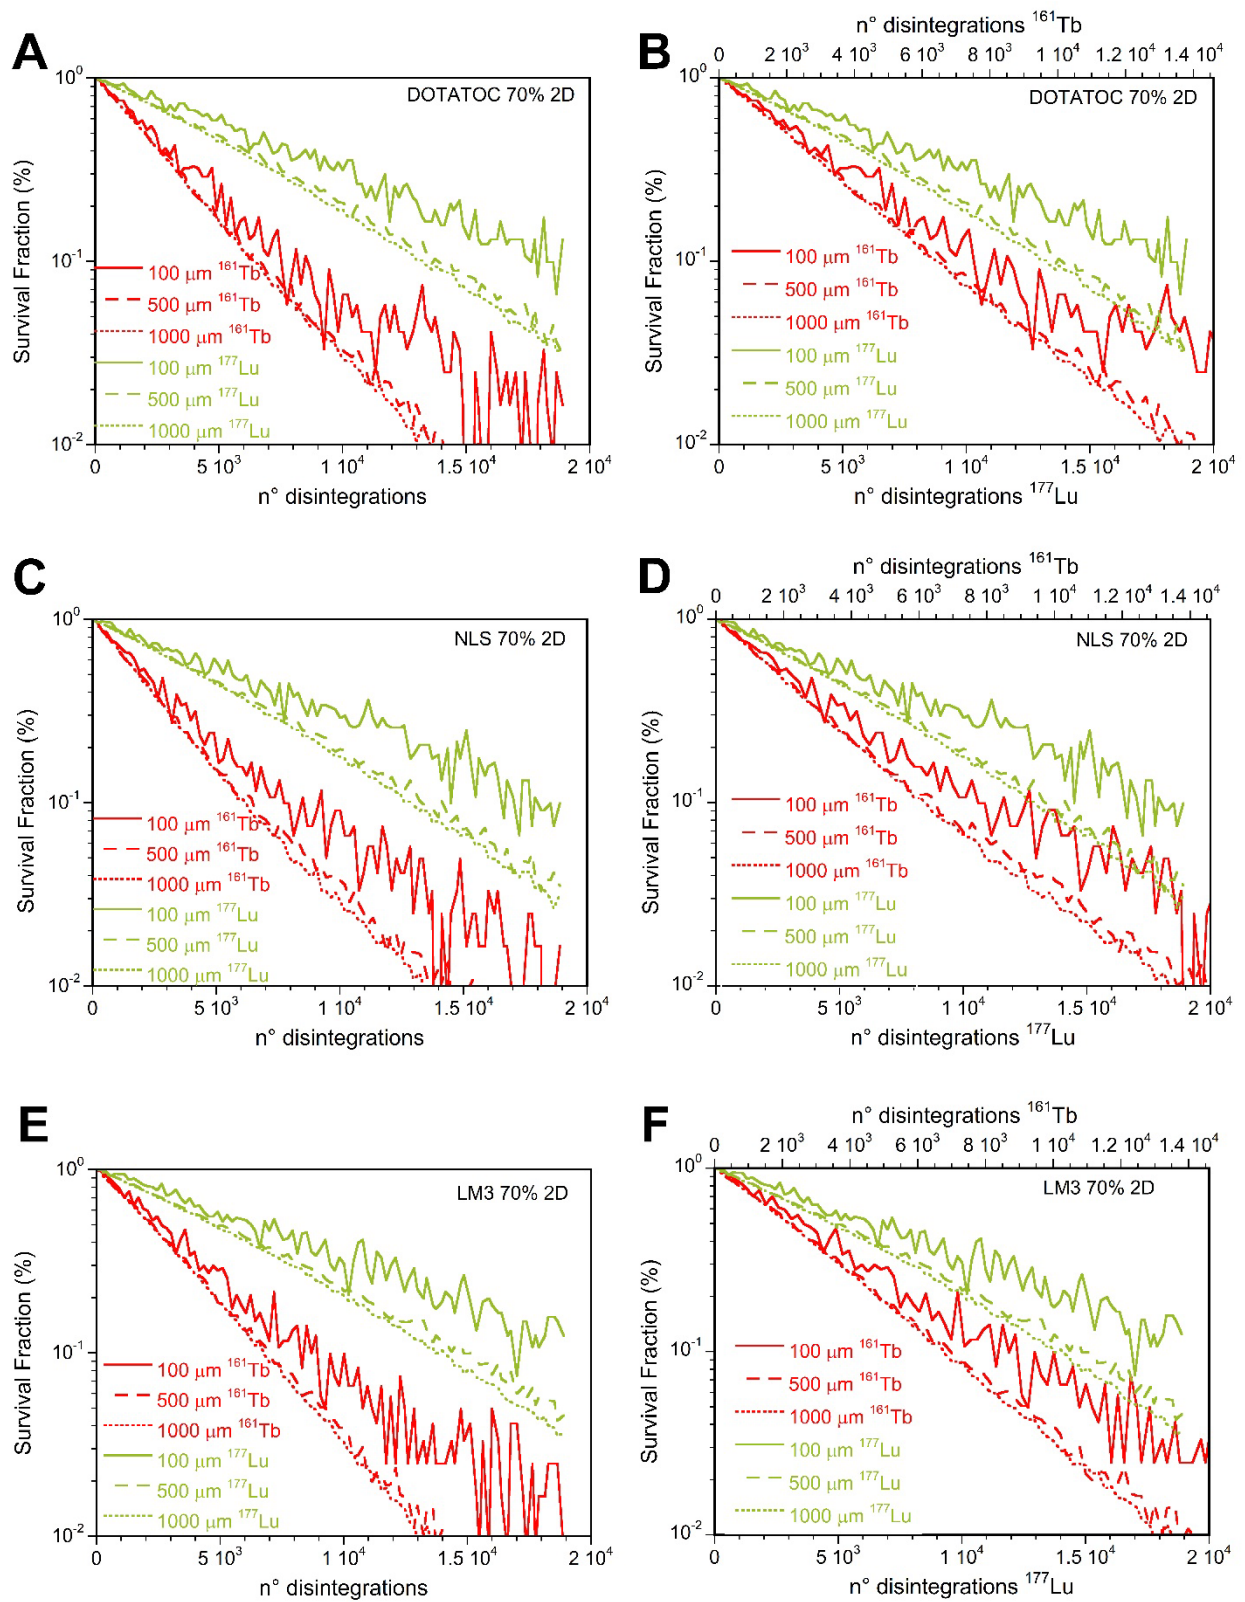

**Figure S9.** Comparison of the survival fraction in the 2D model after administration of  $^{177}\text{Lu}$ -RPs and  $^{161}\text{Tb}$ -RPs in cell colony of 100, 500 and 1000  $\mu\text{m}$  considering different percentage of labeled cells and the same mean number of disintegrations per cell for the two radionuclides (A, C, E) or by scaling the mean number of disintegrations of  $^{161}\text{Tb}$  by a factor of 1.37 (B, D, F).
